# Supplementary material
Source: MDPI journal article supplement (https://www.mdpi.com/2311-7524/9/1/46)
Supplement: s1 [file s1 › horticulturae-2100856-supplementary.pdf]

## Supplementary figures

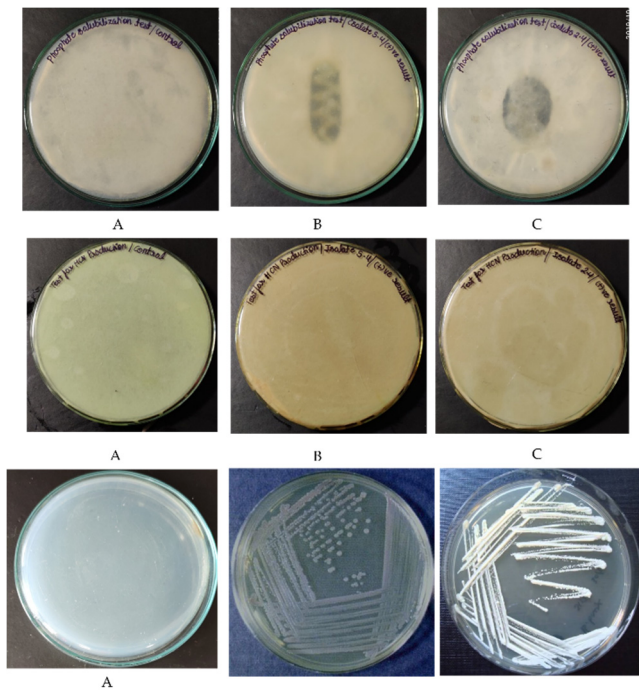

Figure S1. PGPR traits (qualitative): A: Control; B: *Bacillus cereus*; C: *Bacillus haynesii*. First row: Phosphate solubilization; Second row: HCN production; Third row: ACC deaminase production.

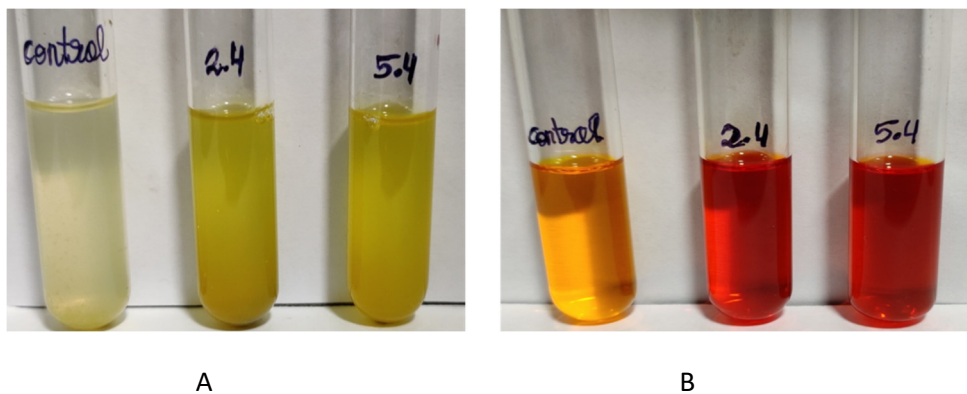

Figure S2. PGPR traits (qualitative): A: Production of ammonia—both the isolates showed positive response B: Production of IAA—both the bacterial isolates were positive for the test
